# Supplementary material
Source: PubMed Central journal article supplement (PMC7275895)
Supplement: NIHMS1578081-supplement-2.pdf [file NIHMS1578081-supplement-2.pdf]

## Supplementary Figure Legend

**Figure S1.** AMPK-pathway related genes are enriched in parietal cells, Related to Figure 1

- A. Pure populations of parietal and non-parietal cells were sorted by flow cytometry of gastric epithelial cells from *Atp4b-cre;Rosa;mT/mG* mice.
- B. Expression Profiles (Affymetrix GeneChip) of flow-sorted parietal cells vs non-parietal gastric cells were analyzed by gene set enrichment analysis (GSEA). GO Genesets with highest Normalized Enrichment Score (NES) in parietal cell VS non-parietal cells were shown, Figure 1, Panel (A): GO\_ Mitochondrial Complex1 Biogenesis
- C. GSEA for GO\_ Oxidative Phosphorylation as for Panel (A)
- D. GSEA for GO\_ ETC Complex Assembly as for Panel (A)
- E. GSEA for GO\_ Cellular Respiration as for Panel (A)
- F. GSEA for GO\_ Electron Transport Chain as for Panel (A)
- G. GSEA for GO\_ Energy Derived by Oxidation as for Panel (A)
- H. GSEA for GO\_ Energy Generation as for Panel (A)
- I. GSEA for GO\_ Organic Acid Catabolic Process as for Panel (A)
- J. GSEA for GO\_ Digestive System Process as for Panel (A)
- K. RNA expression of *Prkaa1* was detected by RNA scope using RNAscope 2.5 HD-Brown kit. Images were taken under high magnification (40X) on an Olympus BX43 light microscope, post-imaging adjustments and stitching were performed with Adobe Photoshop CS6. *Prkaa1* showed sparser labeling overall with slight enrichment in PCs but some labeling also in isthmal/pit cells. Boxed area showed pit, isthmus, neck and bottom zone of stomach glands respectively. Scale bar, 30  $\mu$ m.
- L. RNA scope of *Prkaa2* RNA expression as for Panel (A), *Prkaa2* RNA was expressed in parietal cells and scattered labeling in other cells, in particular isthmal progenitor and pit cells. Boxed area showed pit, isthmus, neck and bottom zone of stomach glands respectively. Scale bar, 30  $\mu$ m.

**Figure S2.** Metformin increases parietal cell census, Related to Figure 2

- A. H&E of stomach corpus glands after 14 days  $\pm$ metformin (MET) at homeostasis. Note the epithelium was thickened in metformin treated mice with increased parietal cells. Scale bar, 30  $\mu$ m.
- B. Mice were treated as follows: pre-treatment stage: 7 days gavage of 300mg/kg or 3mg/ml in drinking water metformin(MET)/vehicle(VEH); Injury stage: 3 days gavage of 300mg/kg or 3mg/ml in drinking water metformin/vehicle alongside 250mg/kg high-dose tamoxifen (TAM) *i.p.* injection.
- C. Mice were treated as follows: pre-treatment stage: 7 days gavage of 300mg/kg or 3mg/ml in drinking water metformin/vehicle; Injury stage: 3 days gavage of 300mg/kg or 3mg/ml in drinking water metformin/vehicle alongside 250mg/kg tamoxifen *i.p.* injection; Recovery stage: 4 days gavage of 300mg/kg or 3mg/ml in drinking water metformin/vehicle.
- D. Mice were treated as follows: pre-treatment stage: 7 days gavage of 300mg/kg or 3mg/ml in drinking water metformin/vehicle; Injury stage: 3 days gavage of 300mg/kg or 3mg/ml in drinking water metformin/vehicle alongside 250mg/kg tamoxifen *i.p.* injection; Recovery stage: 11 days gavage of 300mg/kg or 3mg/ml in drinking water metformin/vehicle.
- E. H&E of stomach corpus glands after high-dose tamoxifen 14 days  $\pm$ metformin treatment showing that metformin increased parietal cell (arrowheads) number (details of mouse treatment is shown in Figure S4B). Scale bar, 30  $\mu$ m.
- F. H&E of wildtype mice stomachs after 3 days high dose tamoxifen  $\pm$  3 days metformin treatment (details of mouse treatment is shown in Figure S4A). Note both conditions exhibited similar damage and metaplastic change with equivalent chief cell loss (manifested as gland dropout) and parietal cell loss. Scale bar, 30  $\mu$ m.
- G. Quantification of surviving parietal cells after tamoxifen injury as in Panel (A). Note, metformin did not affect parietal cell ablation from tamoxifen treatment. Statistical information: datapoints represent the mean value of parietal cells per gastric unit from  $\geq 70$  gastric units counted in an individual mouse. Significance calculated using two-tailed Student's *t*-test.
- H. Immunohistochemistry images of gastric intrinsic factor (GIF) staining of wildtype mice stomachs after 3 days tamoxifen  $\pm$  3 days metformin treatment. Chief cells underwent paligenesis equivalently in both genotypes with scant GIF left in metaplastic cells at the base. Some GIF label is of extruded cell debris. Scale bar, 30  $\mu$ m.
- I. Immunohistochemistry of the metaplastic marker, SOX9, which is induced in paligenotic chief cells after 3 days tamoxifen  $\pm$  3 days metformin treatment. Note SOX9 induction was

not affected by metformin treatment. Boxed areas magnified in insets. Scale bar, 30  $\mu\text{m}$ ; inset, 15  $\mu\text{m}$ .

- J. Table displaying turnover time and percentage of proliferation needed to maintain cell population at homeostasis for 14 days. Turnover time based on altered calculations from Karam and Leblond, 1993b and observed cell census at homeostasis  $\pm$  14 days of metformin.
- K. Representative immunofluorescence of proliferation marker EdU after 3 days tamoxifen  $\pm$  3 days metformin treatment and 36 hour EdU pulse. Note, the pit region of the gland in metformin-treated mouse retained EdU label (green) whereas few cells in pit region of vehicle-treated mouse retained label as highlighted in boxed images. Pit cells were stained with Muc5AC (not shown here). Scale bar, 20  $\mu\text{m}$

**Figure S3.** Metformin decreases proliferation and increases relative parietal cell lineage *ex vivo* in gastric organoids, Related to Figure 3

- A. H&E of growing 1<sup>st</sup> generation gastroids derived from *Atp4b-cre;ROSA mT/mG* mice. Gastroids were treated with vehicle or metformin for 7 days. Parietal cells are typically slowly lost in organoid culture. Single surviving parietal cells are outlined in boxed area; they were characterized by large size, large nuclei and abundant, eosinophilic (pink) cytoplasm with cleared apical membrane folds. Note, from the representative organoids depicted, metformin-treated gastroids had increased parietal cell survival but decreased overall growth compared to control gastroids. Scale bar, 500  $\mu$ m; inset, 200  $\mu$ m.
- B. H&E of 2<sup>nd</sup> generation gastroids derived from *Atp4b-cre;ROSA mT/mG* mice. 2<sup>nd</sup> generation gastroids were passaged from untreated 1<sup>st</sup> generation *Atp4b-cre;ROSA mT/mG* gastroids and treated with metformin or vehicle for 7 days. Note, both parietal lineage and non-parietal lineage cells were able to form gastroids. Single parietal lineage and non-parietal lineage cells are isolated by boxes. Scale bar, 500  $\mu$ m; inset, 200  $\mu$ m.
- C. Dose curve of metformin on gastroid size normalized to control treatment of no metformin. Concentration is expressed logarithmically. Compound C concentration was 5mM. Statistical information: datapoints represent the mean diameter of gastroids normalized to an untreated control for each concentration. Significance calculated using a one-tailed, paired Student's *t*-test of the area under the curve comparing inhibitor-treated vs. metformin-only-dosed curves for organoids derived from a single mouse; both curves with left boundary dictated by vehicle-treatment. The black line represents the mean for each concentration.
- D. Experiment in (C) repeated to confirm effect of Compound C on highest dose of metformin and to determine effects of Compound C (5 mM) alone on gastroid size. Data are all normalized to untreated control. Statistical information: datapoints represent the mean diameter of gastroids from a single mouse normalized to mean diameter of untreated organoids for the same mouse. Significance calculated using one way ANOVA with Dunnett's multiple comparison post hoc correction.
- E. Immunofluorescence for proliferating cells (BrdU, white) and parietal cells (VEGFB, green) in vehicle or metformin treated 1<sup>st</sup> generation *Atp4b-cre;ROSA mT/mG* gastroids. Red arrows: VEGFB<sup>+</sup> parietal cells in 1<sup>st</sup> generation gastroids. Nuclei are stained blue with DAPI. Note metformin decreased proliferative cells and increased parietal cell census. Scale bar, 50  $\mu$ m; inset, 20  $\mu$ m.
- F. Immunofluorescence as for panel (A) in 2<sup>nd</sup> generation, parietal-cell-lineage (green gastroids from Figure 3D) and non-parietal-cell lineages (red in Figure 3D). Metformin decreased

proliferating cells in both types of gastroids. Parietal cells in metformin treatment tended to be larger than in control. Nuclei are stained blue with DAPI. Scale bar, 50  $\mu\text{m}$ ; inset, 20  $\mu\text{m}$ .

**Figure S4.** *Ppargc1*<sup>-/-</sup> stomachs display no change in lineage allocation, but PC-specific loss of AMPK $\alpha$  decreases PC census, Related to Figure 4 and Figure 5

- A. H&E of untreated *Ppargc1*<sup>-/-</sup> and *Ppargc1*<sup>+/+</sup> control mice stomach glands at homeostasis. Parietal cells frequently had stunted or abnormal ezrin networks in *Ppargc1*<sup>-/-</sup> mice. Scale bar, 30  $\mu$ m.
- B. Immunohistochemistry showing DBA staining of *Ppargc1*<sup>-/-</sup> and *Ppargc1*<sup>+/+</sup> control mice stomach glands as for panel (A). Scale bar, 30  $\mu$ m.
- C. Immunohistochemistry showing Mucin 5ac staining of *Ppargc1*<sup>-/-</sup> and *Ppargc1*<sup>+/+</sup> control mice stomach glands as for panel (A). Scale bar, 30  $\mu$ m.
- D. Immunohistochemistry showing GSII staining of *Ppargc1*<sup>-/-</sup> and *Ppargc1*<sup>+/+</sup> control mice stomach glands as for panel (A). Scale bar, 30  $\mu$ m.
- E. Immunohistochemistry showing GIF staining of *Ppargc1*<sup>-/-</sup> and *Ppargc1*<sup>+/+</sup> control mice stomach glands as for panel (A). Scale bar, 30  $\mu$ m.
- F. H&E of *Atp4b-cre;Prkaa1* <sup>$\Delta/\Delta$</sup> ; *Prkaa2* <sup>$\Delta/\Delta$</sup>  and *Atp4b-cre* control stomach corpus in homeostasis. *Atp4b-cre;Prkaa1* <sup>$\Delta/\Delta$</sup> ; *Prkaa2* <sup>$\Delta/\Delta$</sup>  mice had decreased parietal cell number. Scale bar, 30  $\mu$ m.
- G. Immunohistochemistry for parietal-cell-enriched protein Ezrin with mice as for panel (A). Note *Atp4b-cre;Prkaa1* <sup>$\Delta/\Delta$</sup> ; *Prkaa2* <sup>$\Delta/\Delta$</sup>  mice had decreased parietal cell number. Scale bar, 30  $\mu$ m.
- H. Quantification of the distance from nucleus to margin of *Atp4b-cre;Prkaa1* <sup>$\Delta/\Delta$</sup> ; *Prkaa2* <sup>$\Delta/\Delta$</sup>  and *Atp4b-cre* control mice in homeostasis. Note parietal cells in *Atp4b-cre;Prkaa1* <sup>$\Delta/\Delta$</sup> ; *Prkaa2* <sup>$\Delta/\Delta$</sup>  stomach exhibited a more eccentric nuclear position which indicated a less developed status, as parietal cell nuclei become centralized as they mature. Statistical information: datapoints represent distance for a single parietal cell, all collected from  $\geq 200$  parietal cells across three mice. Significance calculated using one-tailed Student's *t*-test.

**Figure S5:** Metformin enriches genesets associated with energetics in wildtype mice, but enriches genesets for development and stem cell differentiation in AMPK-deficient mice, Related to Figure 6

- A. GO Genesets with highest Normalized Enrichment Score (NES) in Metformin (METD14) treated wildtype mice compared to the vehicle (VEHD14) treated control was shown in Figure 6A: GO\_ Oxidative Phosphorylation
- B. GSEA for GO\_ Mitochondrial Respiratory Chain Complex Assembly as for Figure 6A
- C. GSEA for GO\_ Electron Transport Chain as for Figure 6A
- D. GSEA for GO\_ Mitochondrial Respiratory Chain Complex1 Biogenesis as for Figure 6A
- E. GSEA for GO\_ Mitochondrial Translation as for Figure 6A
- F. GO Genesets with highest Normalized Enrichment Score (NES) in Metformin (METD14) treated *Atp4b-cre;Prkaa1<sup>ΔΔ</sup>;Prkaa2<sup>ΔΔ</sup>* mice (AMPK mutant METD14) compared to the vehicle (VEHD14) treated *Atp4b-cre;Prkaa1<sup>ΔΔ</sup>;Prkaa2<sup>ΔΔ</sup>* mice (AMPK mutant VEHD14) was shown in Figure 6B: GO\_ Epidermis Development
- G. GSEA for GO\_ Epithelial Cell Differentiation as for Figure 6B
- H. GSEA for GO\_ Morphogenesis of an Epithelium as for Figure 6B
- I. GSEA for GO\_ Tissue Development as for Figure 6B
- J. GSEA for GO\_ Embryonic Development as for Figure 6B

**Figure S6.** PC-specific loss of AMPK $\alpha$  and *Ppargc1* decreases PC census and maturity, Related to Figure 5, Figure 6, and Figure 7

- A. Representative bright field image of gastroid derived from *Atp4b-cre;Prkaa1 $\Delta\Delta$ ;Prkaa2 $\Delta\Delta$*  and *Atp4b-cre* control mice treated for 7 days  $\pm$  metformin. Scale bar, 200  $\mu$ m.
- B. Quantification of diameter of 1<sup>st</sup> generation gastroids as for panel (A). Statistical information: datapoints represent the mean gastroid diameter of  $\sim$ 50 gastroids from an individual mouse. Significance calculated using tw
- C. H&E of *Atp4b-cre;Ppargc1 $\Delta\Delta$*  and *Atp4b-cre* control stomach corpus in homeostasis. *Atp4b-cre;Ppargc1 $\Delta\Delta$*  mice had decreased parietal cell number. Scale bar, 30  $\mu$ m.
- D. Immunohistochemistry for parietal-cell-enriched protein Ezrin with mice as for panel (A). Note, *Atp4b-cre;Ppargc1 $\Delta\Delta$*  mice had decreased parietal cell number. Scale bar, 30  $\mu$ m.
- E. Quantification of the distance from nucleus to margin of *Atp4b-cre;Ppargc1 $\Delta\Delta$*  and *Atp4b-cre* control mice in homeostasis. Note parietal cells in *Atp4b-cre;Ppargc1 $\Delta\Delta$*  stomach exhibited a more eccentric nuclear position which indicated a less developed status, as parietal cell nuclei become centralized as they mature. Statistical information: datapoints represent distance for a single parietal cell, all collected from  $\geq$ 225 parietal cells across three mice. Significance calculated using one-tailed Student's *t*-test.
- F. Quantification of gastric juice pH value of *Atp4b-cre;Ppargc1 $\Delta\Delta$*  and *Atp4b-cre* control mice. pH value was significantly increased in *Atp4b-cre;Ppargc1 $\Delta\Delta$*  mice. Statistical information: datapoints represent pH value from an individual mouse. Significance was calculated using two-tailed Student's *t*-test.
- G. Immunofluorescence for parietal cells (Ezrin, green) and ribosomal protein S6 phosphorylated at the 240/244 residues indicating mTORC1 activation (red) in *Atp4b-cre;Prkaa1 $\Delta\Delta$ ;Prkaa2 $\Delta\Delta$* , *Atp4b-cre;Ppargc1 $\Delta\Delta$*  or *Atp4b-cre* control mice at homeostasis. Note, as opposed to control PCs, both mutant mice had parietal cells exhibiting cytoplasmic pS6 240/24, indicating mutant PCs aberrantly activated mTORC1. Nuclei are stained blue with DAPI. Scale bar, 30  $\mu$ m; inset, 15  $\mu$ m.
- H. Transmission electron microscopy of control and mutant mice in homeostasis. Note mitochondria (eg, outlined in yellow) in parietal cells of both mutants showed morphology with pinched, twisted morphology and disordered cristae (*upper row*). Free ribosomes (arrows) accumulated in both mutants (*lower row*), whereas free ribosomes are rare in wildtype parietal cells; ribosomogenesis is consistent with increased mTORC1. Lysosomes (eg outlined in red) in control parietal cells were globular and adjacent to mitochondria, as we have shown previously in Lo et al., 2018. In mutants,



lysosomes were irregular in size and shape and often not near mitochondria. Scale bar, 1  $\mu\text{m}$ .

**Figure S7.** Metformin no longer affects parietal cell maturation in mice with PC-specific AMPK deletion but still significantly decreases progenitor cell proliferation, Related to Figure 6

- A. H&E of *Atp4b-cre;Prkaa1<sup>ΔΔ</sup>;Prkaa2<sup>ΔΔ</sup>* and *Atp4b-cre* control mice after high dose tamoxifen (TAM) ±7 days metformin. Note mutant mice had decreased parietal cell (eg arrowheads) number and size compared to control animal when treated with vehicle or metformin. Scale bar, 30 μm.
- B. Quantification of stomach gastric juice pH value in control and mutant mice as treated in panel (A). Note pH increased in the *Atp4b-cre;Prkaa1<sup>ΔΔ</sup>;Prkaa2<sup>ΔΔ</sup>* mice, consistent with decreased parietal cell function. Metformin caused increased parietal cell function in *Atp4b-cre* control mice as measured by gastric pH but could not decrease pH in mutant, consistent with effects of metformin on parietal cell being governed by AMPK. Statistical information: datapoints represent pH value from an individual mouse. Significance calculated using one-tailed Student's *t*-test as the groups were independently compared.
- C. Quantification of nuclear eccentricity *Atp4b-cre;Prkaa1<sup>ΔΔ</sup>;Prkaa2<sup>ΔΔ</sup>* and *Atp4b-cre* control mouse parietal cells treated as in panel (A). Note parietal cells in *Atp4b-cre;Prkaa1<sup>ΔΔ</sup>;Prkaa2<sup>ΔΔ</sup>* mice exhibited a more eccentric nuclear position when treated with vehicle alone compared to vehicle treated wildtype control, consistent with immaturity. Statistical Information: Statistical information: datapoints represent distance for a single parietal cell, all collected from ≥30 parietal cells across three mice. Significance calculated using one-tailed Student's *t*-test as the groups were independently compared.
- D. Immunofluorescence of *Atp4b-cre;Ppargc1<sup>ΔΔ</sup>* and *Atp4b-cre* control mice after high dose tamoxifen (TAM) ±7 days metformin. Parietal cells (red, VEGFB); mucous neck cells (green, GSII); nuclei (blue, DAPI). Metformin did not affect abnormal parietal cell morphology or census in mutant animals compared to vehicle treated mutant. Scale bar, 30 μm
- E. H&E of *Atp4b-cre;Ppargc1<sup>ΔΔ</sup>* and *Atp4b-cre* control mice after high dose tamoxifen (TAM) ±7 days metformin. Note, *Atp4b-cre;Ppargc1<sup>ΔΔ</sup>* mice had decreased parietal cell number and size compared to control animal when treated with vehicle or metformin. Scale bar, 30 μm.
- F. Quantification of parietal cell size (diameter) *Atp4b-cre;Ppargc1<sup>ΔΔ</sup>* and *Atp4b-cre* control mouse parietal cells treated as in panel (A). Note parietal cells in *Atp4b-cre;Ppargc1<sup>ΔΔ</sup>* mice exhibited a smaller size when treated with vehicle alone compared to vehicle treated wildtype control, consistent with immaturity; however Metformin did not increase parietal diameter in *Atp4b-cre;Ppargc1<sup>ΔΔ</sup>* mouse compared to vehicle-treated *Atp4b-cre;Ppargc1<sup>ΔΔ</sup>* mouse. Statistical information: datapoints represent the mean parietal cell size from ≥50

parietal cells counted in an individual mouse. Significance calculated using one-tailed Student's *t*-test as the groups were independently compared.

- G. Quantification of stomach gastric juice pH value in *Atp4b-cre;Ppargc1<sup>Δ/Δ</sup>* and *Atp4b-cre* control mice as treated in panel (A). Note pH increased in *Atp4b-cre;Ppargc1<sup>Δ/Δ</sup>* mouse, consistent with decreased parietal cell function. Metformin increased parietal cell function in *Atp4b-cre* control mice as measured by gastric pH but could not decrease pH in *Atp4b-cre;Ppargc1<sup>Δ/Δ</sup>* mouse, consistent with effects of metformin on parietal cell being governed by AMPK. Statistical information: datapoints represent pH value from an individual mouse. Significance calculated using one-tailed Student's *t*-test as the groups were independently compared.
- H. Quantification of nuclear eccentricity of *Atp4b-cre;Ppargc1<sup>Δ/Δ</sup>* and *Atp4b-cre* control mouse parietal cells treated as in panel (A). Note parietal cells in *Atp4b-cre;Ppargc1<sup>Δ/Δ</sup>* mice exhibited a more eccentric nuclear position when treated with vehicle alone compared to vehicle treated wildtype control, consistent with immaturity. Statistical information: datapoints represent distance for a single parietal cell, all collected from  $\geq 30$  parietal cells across three mice. Significance calculated using one-tailed Student's *t*-test as the groups were independently compared.

Figure S1

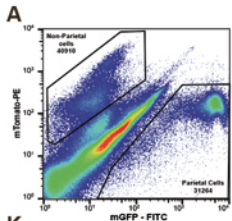

**K**

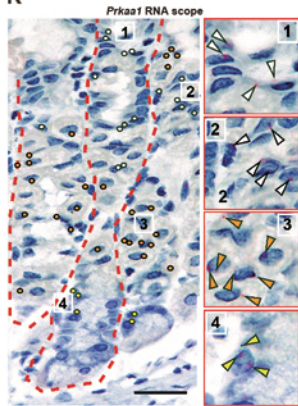

**L**

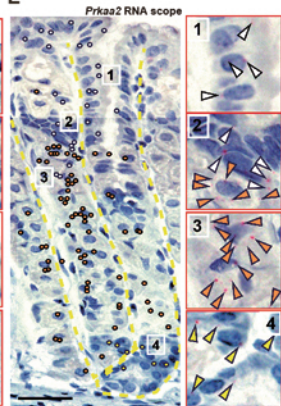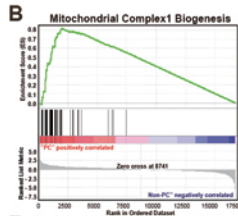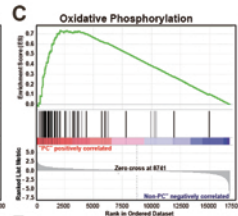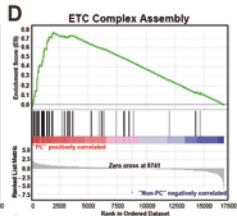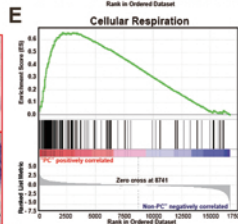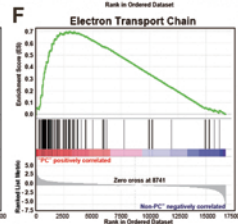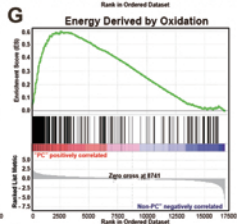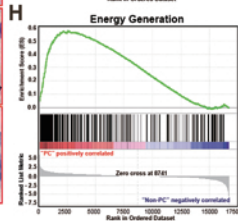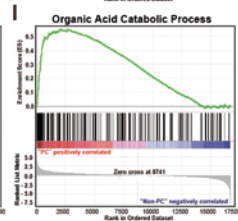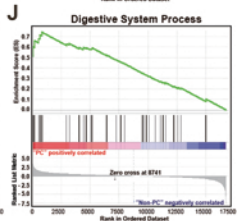

Figure S2

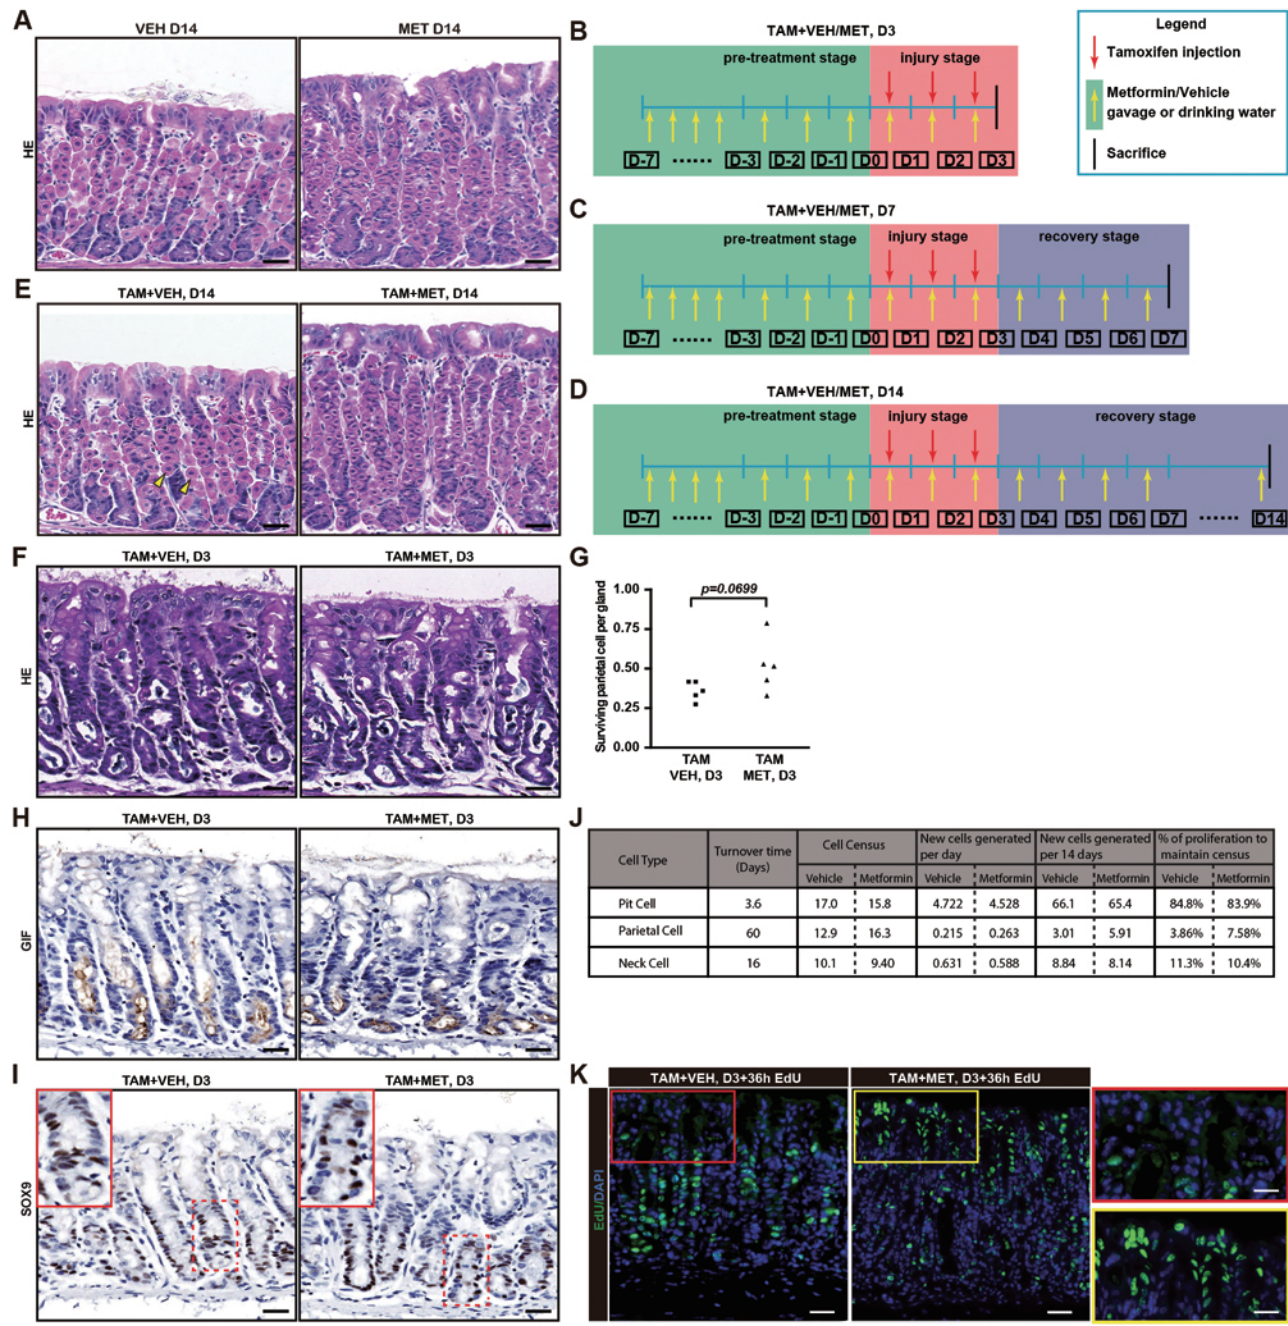

**Figure S3**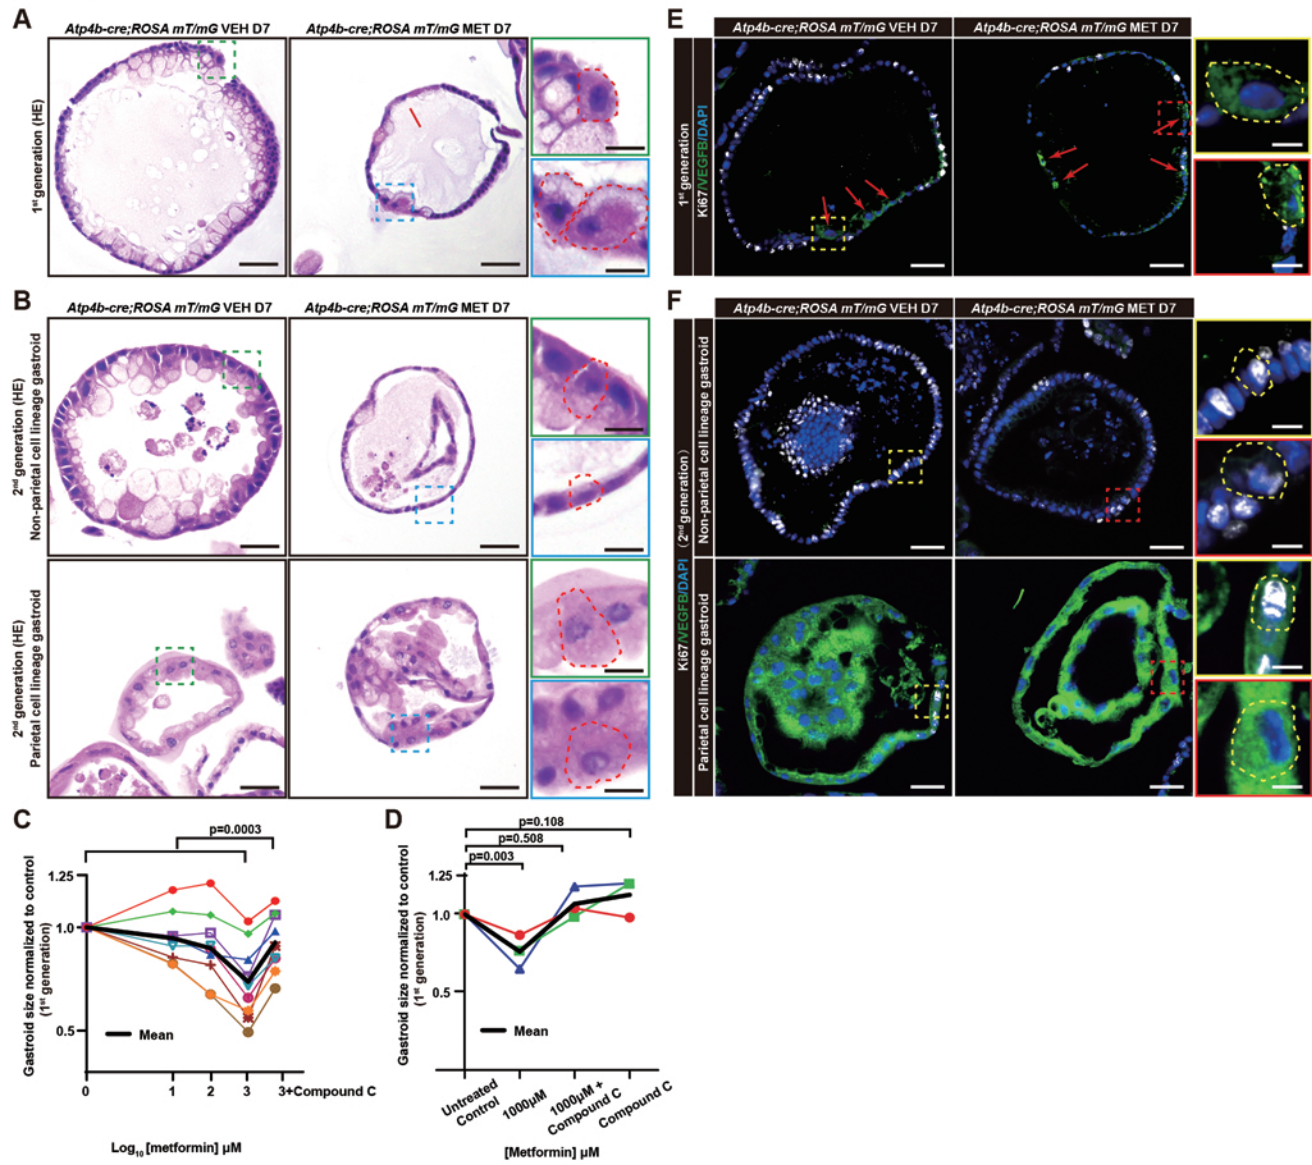

Figure S4

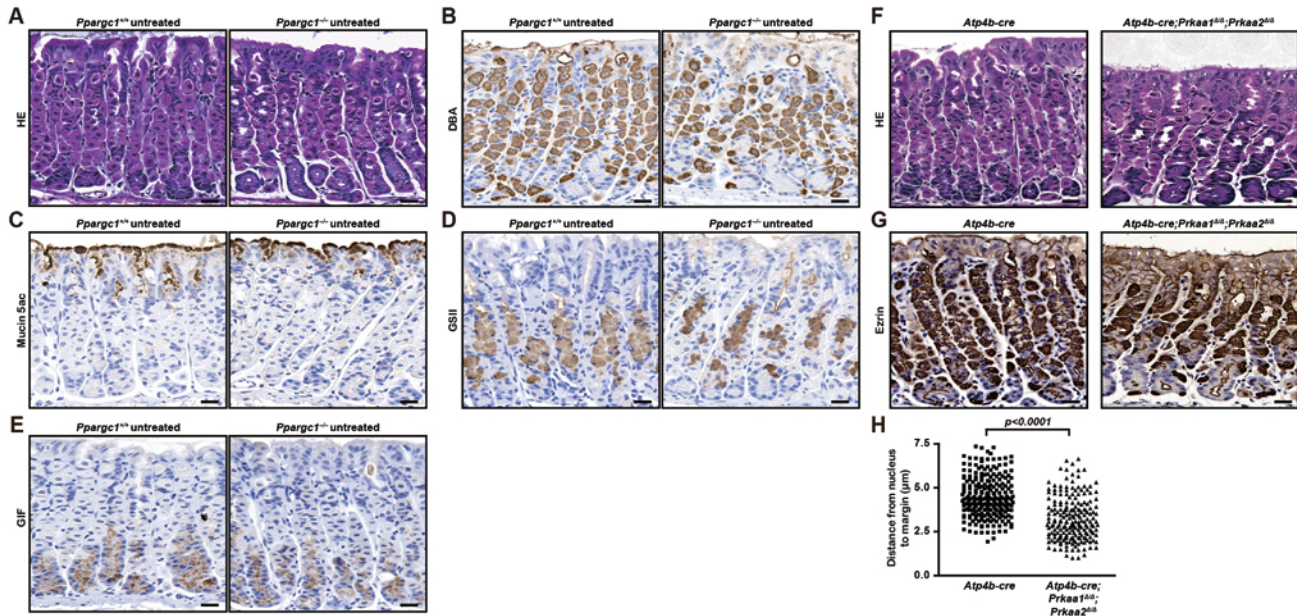

**Figure S5**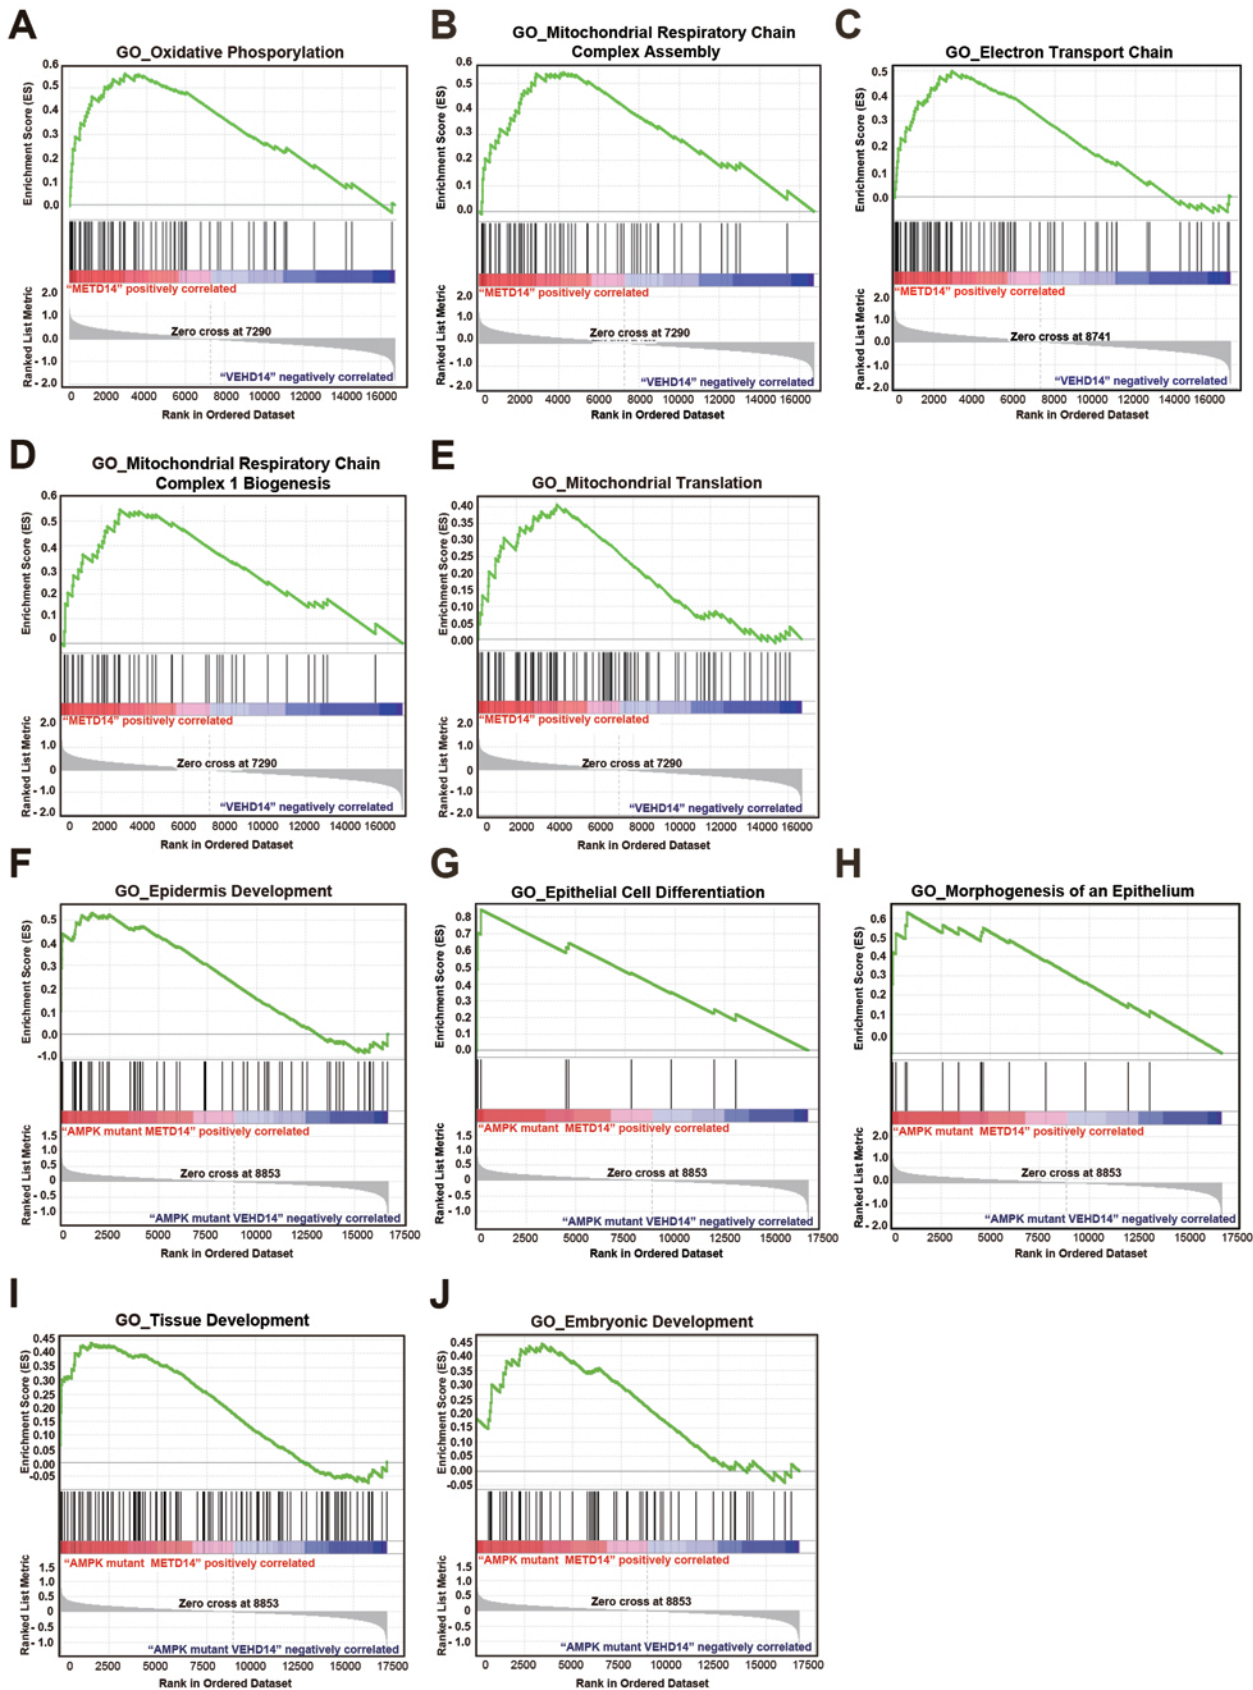



Figure S6

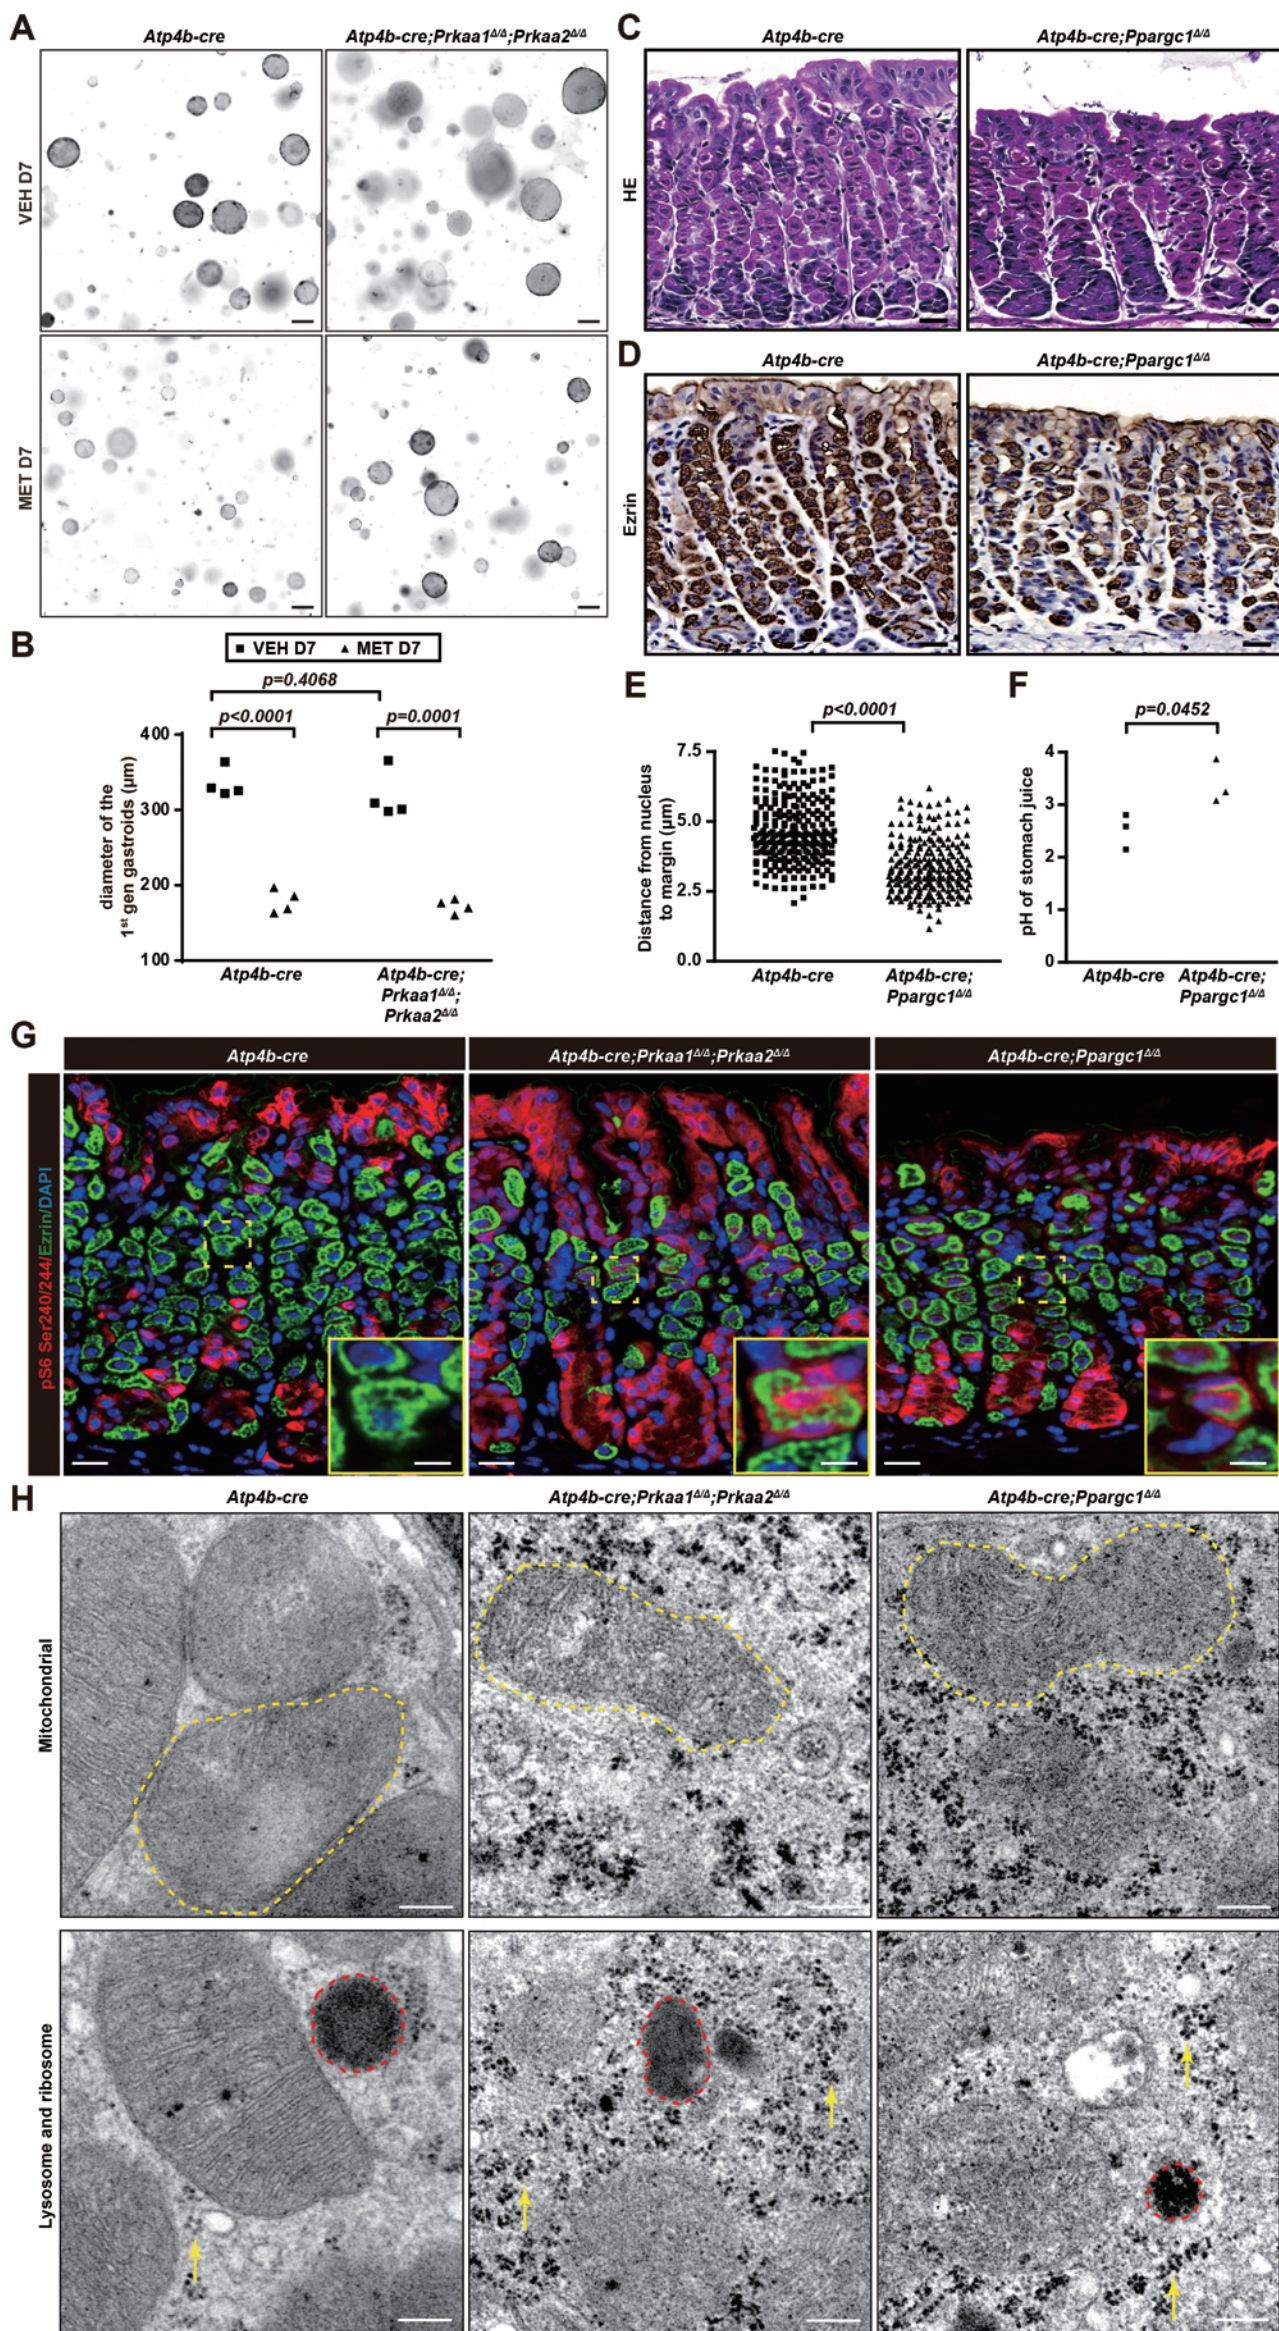

Figure S7

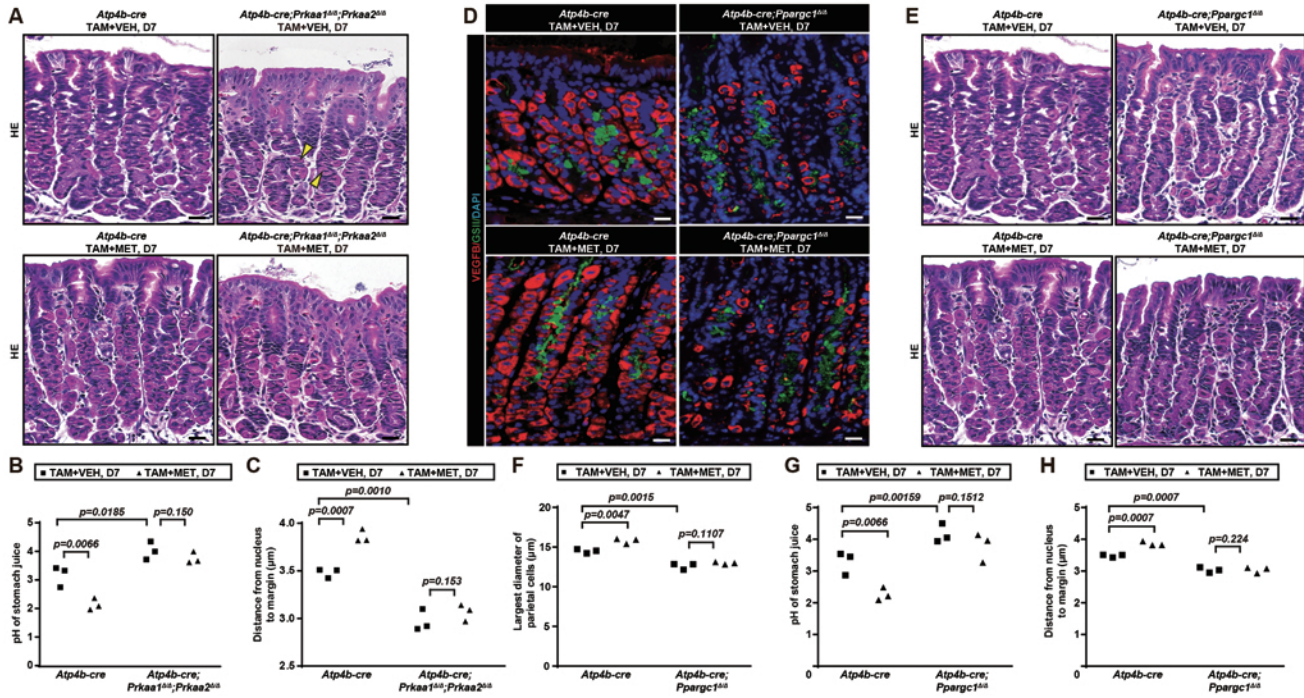

## **Supplementary Table Legends**

### **Table S1**

AMPK related genes enriched in parietal cells

### **Table S2**

Metformin D14 all lineage quantification

### **Table S3**

Genotyping primers

### **Table S4**

Antibodies Source and application

### **Table S5**

qPCR primers

### **Table S6**

Statistical Breakdown

### **Table S7**

Markers of various stomach cell type

**Table S1.** Gene expression of AMPK related genes enriched in parietal cell population, Related to Figure S1

| Gene Name       | Gene ID            | Fold change compared to non-Parietal cells |
|-----------------|--------------------|--------------------------------------------|
| <i>Ppargc1a</i> | ENSMUSG00000029167 | 22.905                                     |
| <i>Ascl1</i>    | ENSMUSG00000018796 | 9.309                                      |
| <i>Acacb</i>    | ENSMUSG00000042010 | 4.080                                      |
| <i>Prkaa2</i>   | ENSMUSG00000028518 | 3.526                                      |
| <i>Stradb</i>   | ENSMUSG00000026027 | 2.585                                      |
| <i>Prkab2</i>   | ENSMUSG00000038205 | 2.152                                      |
| <i>Strada</i>   | ENSMUSG00000069631 | 2.146                                      |
| <i>Prkag1</i>   | ENSMUSG00000067713 | 2.006                                      |
| <i>Cpt1a</i>    | ENSMUSG00000024900 | 1.853                                      |
| <i>Slc25a20</i> | ENSMUSG00000032602 | 1.541                                      |
| <i>Prkag2</i>   | ENSMUSG00000028944 | 1.456                                      |
| <i>Cab39</i>    | ENSMUSG00000036707 | 1.365                                      |
| <i>Stk11</i>    | ENSMUSG00000003068 | 1.345                                      |
| <i>Prkaa1</i>   | ENSMUSG00000050697 | 1.284                                      |
| <i>Ppm1a</i>    | ENSMUSG00000021096 | 1.252                                      |
| <i>Rptor</i>    | ENSMUSG00000025583 | 1.194                                      |
| <i>Cpt2</i>     | ENSMUSG00000028607 | 1.155                                      |
| <i>Prkab1</i>   | ENSMUSG00000029513 | 0.723                                      |

**Table S2.** Changes in cell lineage allocation in metformin treated mice, Related to Figure 1E

| <b>Cell Type</b>  | <b>D14 Vehicle-treated<br/>(Cells per unit <math>\pm</math>SEM)</b> | <b>D14 Metformin-treated<br/>(Cells per unit <math>\pm</math>SEM)</b> |
|-------------------|---------------------------------------------------------------------|-----------------------------------------------------------------------|
| Pit cell          | 17.02 $\pm$ 0.28                                                    | 16.29 $\pm$ 0.65                                                      |
| Parietal Cell     | 12.93 $\pm$ 1.40                                                    | 15.79 $\pm$ 1.62                                                      |
| Mucous Neck Cell  | 10.07 $\pm$ 0.13                                                    | 9.35 $\pm$ 0.25                                                       |
| Chief Cell        | 8.63 $\pm$ 0.59                                                     | 9.24 $\pm$ 0.17                                                       |
| Total Cell number | 48.59 $\pm$ 1.67                                                    | 50.68 $\pm$ 2.10                                                      |

**Table S3.** Genotyping primers, Related to STAR Methods

| <b>mice name</b>                   | <b>primer</b>  | <b>Sequence</b>                    |
|------------------------------------|----------------|------------------------------------|
| <i>Atp4b-cre</i>                   | Common Forward | AGG GAT CGC CAG GCG TTT TC         |
|                                    | Common Reverse | GTT TTC TTT TCG GAT CCG CC         |
| <i>Rosa mT/mG</i>                  | Common Forward | AAG GGA GCT GCA GTG GAG TA         |
|                                    | WT Reverse     | CCG AAA ATC TGT GGG AAG TC         |
|                                    | Mutant Reverse | CGG GCC ATT TAC CGT AAG TTA T      |
| <i>Prkaa1<sup>flox/flox</sup></i>  | Common Forward | CCC ACC ATC ACT CCA TCT CT         |
|                                    | Common Reverse | AGC CTG CTT GGC ACA CTT AT         |
| <i>Prkaa2<sup>flox/flox</sup></i>  | Common Forward | GCA GGC GAA TTT CTG AGT TC         |
|                                    | Common Reverse | TCC CCT TGA ACA AGC ATA CC         |
| <i>Ppargc1<sup>flox/flox</sup></i> | Common Forward | TCC AGT AGG CAG AGA TTT ATG AC     |
|                                    | Common Reverse | TGT CTG GTT TGA CAA TCT GCT AGG TC |

**Table S4.** Antibodies Source and application, Related to STAR Methods

| <b>Antibody</b>      | <b>Source</b>                      | <b>application</b> | <b>dilution</b>            |
|----------------------|------------------------------------|--------------------|----------------------------|
| Brdu                 | DSHB (G3G4)                        | IF, IHC            | 1:100                      |
| VEGFb                | Santa Cruz (sc-1876)               | IF                 | 1:100                      |
| GIF                  | gift of Dr. David Alpers,<br>WUSTL | IF, IHC            | 1:10000                    |
| LKB1                 | Santa Cruz (sc-32245)              | IHC                | 1:200                      |
| AMPK $\alpha$        | Cell Signaling (#2532)             | WB                 | 1:1000                     |
| AMPK $\alpha$ 2      | Sigma-Aldrich (HPA044540)          | IHC                | 1:200                      |
| PGC1 $\alpha$        | Abcam(ab54481)                     | WB, IHC            | 1:2000 (WB);<br>1:400 (IF) |
| Sox9                 | Millipore (ABE 571)                | IHC                | 1:1500                     |
| GFP                  | Santa Cruz (sc-9996)               | IF                 | 1:100                      |
| pS6 (240/244)        | Cell Signaling (#2215)             | IF                 | 1:200                      |
| Tubulin              | Abcam (ab21057)                    | WB                 | 1:1000                     |
| Ezrin                | Santa Cruz (sc-58758)              | IF, IHC            | 1:100                      |
| cytochromeC          | Abcam (ab13575)                    | IF                 | 1:200                      |
| GSII-Alexa Fluor 647 | Invitrogen (L32451)                | IF                 | 1:500                      |

**Table S5.** qPCR primers, Related to STAR Methods

| <b>Gene</b>     | <b>Primer</b> | <b>Sequence</b>         |
|-----------------|---------------|-------------------------|
| <i>Prkaa1</i>   | Forward       | GTCAAAGCCGACCCAATGATA   |
|                 | Reverse       | CGTACACGAAAATAATAGGGGTT |
| <i>Prkaa2</i>   | Forward       | CAGGCCATAAAGTGGCAGTTA   |
|                 | Reverse       | AAAAGTCTGTCTGGAGTGCTGA  |
| <i>Ppargc1a</i> | Forward       | TATGGAGTGACATAGAGTGTGCT |
|                 | Reverse       | CCACTTCAATCCACCCAGAAAG  |
| <i>Ezrin</i>    | Forward       | CAATCAACGTCCGGGTGAC     |
|                 | Reverse       | GCCAATCGTCTTTACCACCTGA  |
| <i>Atp4b</i>    | Forward       | CAGGAGAAGAAGTCATGCAGC   |
|                 | Reverse       | GAAACCTGCGTAGTACAGGCT   |
| <i>VefgB</i>    | Forward       | GCCAGACAGGGTTGCCATAC    |
|                 | Reverse       | GGAGTGGGATGGATGATGTCAG  |
| <i>TBP</i>      | Forward       | CAAACCCAGAATTGTTCTCCTT  |
|                 | Reverse       | ATGTGGTCTTCCTGAATCCCT   |



**Table S6.** Statistical analysis breakdown of data, Related to STAR Methods

| Main          | Figure | Description                         | Statistical test                                     | Tails                                         |
|---------------|--------|-------------------------------------|------------------------------------------------------|-----------------------------------------------|
|               | 1E     | All lineage quant                   | Unpaired student 's <i>t</i> -test                   | all 2 tailed +SEM                             |
|               | 1G     | WT BrdU METD14                      | Unpaired student 's <i>t</i> -test                   | 2-tailed                                      |
|               | 2B     | HDT+Met qPCR ampka1,2 pgc1a         | Unpaired student 's <i>t</i> -test                   | 1-tailed+SEM                                  |
|               | 2C     | HDT+Met qPCR Ezrin, Atp4b, VegfB    | Unpaired student 's <i>t</i> -test                   | 1-tailed+SEM                                  |
|               | 2E     | PC number HDT+METD14                | Unpaired student 's <i>t</i> -test                   | 1-tailed                                      |
|               | 2G     | WT HDT+MetD14 BrdU                  | Unpaired student 's <i>t</i> -test                   | 1-tailed                                      |
|               | 3B     | 1ST Gen Gastroid diameter           | Unpaired student 's <i>t</i> -test                   | 1-tailed                                      |
|               | 3C     | 1st gen Green/red ratio             | Unpaired student 's <i>t</i> -test                   | 1-tailed                                      |
|               | 3E     | 2nd gen gastroid size               | Unpaired student 's <i>t</i> -test                   | 1-tailed                                      |
|               | 4B     | KLF4+/Ezrin+ Cell Day14             | Unpaired student 's <i>t</i> -test                   | 1-tailed                                      |
|               | 4D     | KLF4+ HDT+METD7                     | Unpaired student 's <i>t</i> -test                   | 1-tailed                                      |
|               | 4F     | All lineage quant in global PGC1aKO | Unpaired student 's <i>t</i> -test                   | 2-tailed+SEM                                  |
|               | 4H     | Global PGC1a-/- BrdU Untreated      | Unpaired student 's <i>t</i> -test                   | 2-tailed                                      |
|               | 5B     | Ampk KO pH                          | Unpaired student 's <i>t</i> -test                   | 2-tailed                                      |
|               | 5D     | Ampk KO PC number                   | Unpaired student 's <i>t</i> -test                   | 2-tailed                                      |
|               | 5F     | Ampk KO BrdU                        | Unpaired student 's <i>t</i> -test                   | 2-tailed                                      |
|               | 6F     | Ampk KO+HDT/METD7 PC number         | Unpaired student 's <i>t</i> -test                   | 1-tailed                                      |
|               | 6G     | Ampk KO+HDT/METD7 BrdU              | Unpaired student 's <i>t</i> -test                   | 1-tailed                                      |
|               | 7C     | WT DKO PGC1KO Diameter              | One-way ANOVA                                        | ANOVA, Dunnett's Multiple comparison post hoc |
|               | 7F     | WT DKO PGC1KO mitochondria          | One-way ANOVA                                        | ANOVA, Dunnett's Multiple comparison post hoc |
|               |        |                                     |                                                      |                                               |
| Supplementary | SF2G   | Surviving PC in TAM+/- MetD3        | Unpaired student 's <i>t</i> -test                   | 2-tailed                                      |
|               | SF3C   | Dose Curve                          | Paired student 's <i>t</i> -test on Area Under Curve | 1-tailed                                      |
|               | SF3D   | Compound C Dose                     | One-way ANOVA                                        | ANOVA; Dunnett's multiple comparison post hoc |
|               | SF4H   | Nucleus margin Ampk KO              | Unpaired student 's <i>t</i> -test                   | 1-Tailed                                      |
|               | SF6B   | Ampk KO Gastroid+METD7              | Unpaired student 's <i>t</i> -test                   | 2-tailed                                      |
|               | SF6E   | Nucleus margin PGC                  | Unpaired student 's <i>t</i> -test                   | 1-tailed                                      |
|               | SF6F   | PGC1 KO pH                          | Unpaired student 's <i>t</i> -test                   | 2-tailed                                      |
|               | SF7B   | Ampk KO+HDT/METD7 pH                | Unpaired student 's <i>t</i> -test                   | 1-tailed                                      |
|               | SF7C   | Ampk KO+HDT/METD7 Nucleus           | Unpaired student 's <i>t</i> -test                   | 1-tailed                                      |
|               | SF7F   | PGC1K+HDT/METD3 Diameter            | Unpaired student 's <i>t</i> -test                   | 1-tailed                                      |
|               | SF7G   | PGC1K+HDT/METD3 pH                  | Unpaired student 's <i>t</i> -test                   | 1-tailed                                      |
|               | SF7H   | PGC1K+HDT/METD3 Nucleus             | Unpaired student 's <i>t</i> -test                   | 1-tailed                                      |

**Table S7.** Protein markers of various stomach cell type, Related to STAR Methods

| <b>Cell type</b>      | <b>Marker</b> |
|-----------------------|---------------|
| <b>Parietal cells</b> | Vegfb         |
|                       | DBA           |
|                       | Ezrin         |
| <b>Chief cells</b>    | GIF           |
| <b>Pit cells</b>      | Mucin 5ac     |
| <b>Neck cells</b>     | GSII          |
